# Supplementary material for: High-Intensity Focused Ultrasound Decreases Subcutaneous Fat Tissue Thickness by Increasing Apoptosis and Autophagy
Source: MDPI journal article supplement (doi:10.3390/biom13020392), 2023-02-18
Supplement: s1 [file s1]

## Article

# High-Intensity Focused Ultrasound Decreases Subcutaneous Fat Tissue Thickness by Increasing Apoptosis and Autophagy

Kyung-A Byun <sup>1,2,†</sup>, Hyun Jun Park <sup>3,†</sup>, Seyeon Oh <sup>2</sup>, Sosorburam Batsukh <sup>1,2</sup>, Hye Jin Sun <sup>4</sup>, Taehui Kim <sup>4</sup>, Sunggeun Kim <sup>4</sup>, Donghwan Kang <sup>4</sup>, Kuk Hui Son <sup>5,\*</sup> and Kyunghee Byun <sup>1,2,\*</sup>

<sup>1</sup> Department of Anatomy & Cell Biology, College of Medicine, Gachon University, Incheon 21936, Republic of Korea

<sup>2</sup> Functional Cellular Networks Laboratory, Lee Gil Ya Cancer and Diabetes Institute, Gachon University of Medicine, Incheon 21999, Republic of Korea

<sup>3</sup> Maylin Anti-Aging Center Apgujeong, Seoul 06005, Republic of Korea

<sup>4</sup> Jeisys Medical Inc., Seoul 08501, Republic of Korea

<sup>5</sup> Department of Thoracic and Cardiovascular Surgery, Gachon University Gil Medical Center, Gachon University, Incheon 21565, Republic of Korea

† These authors contributed equally to this work as co-first authors of this study.

\* Correspondence: dr632@gilhospital.com (K.H.S.); khbyun1@gachon.ac.kr (K.B.); Tel.: +82-32-460-3666 (K.H.S.); +82-32-899-6511 (K.B.)

**Table S1.** List of antibodies used for western blot.

| Antigen (host)          | Company                   | Catalog no. | Dilution rate |
|-------------------------|---------------------------|-------------|---------------|
| p53 (Moues)             | Santa cruz biotechnology  | Sc-126      | 1:1,000       |
| Histon H1 (Rabbit)      | Abclonal                  | A4342       | 1:1,000       |
| COX IV (Mouse)          | Cell signaling technology | 11967       | 1:1,000       |
| $\beta$ -actin (Rabbit) | Cell signaling technology | 4967        | 1:1,000       |
| BCL2 (Rabbit)           | Abclonal                  | A11313      | 1:1,000       |
| BCL-xL (Moues)          | Santa cruz biotechnology  | Sc-8392     | 1:500         |
| BAX (Rabbit)            | Cell signaling technology | 2774        | 1:1,000       |
| BAK (Rabbit)            | Abclonal                  | A0498       | 1:1,000       |
| Cyto C (Rabbit)         | Cell signaling technology | 4280        | 1:1,000       |
| Caspase 3 (Rabbit)      | Cell signaling technology | 9662        | 1:1,000       |
| Caspase 9 (Mouse)       | Cell signaling technology | 9508        | 1:1,000       |
| ATG5 (Rabbit)           | Novus Biological          | NB110-53818 | 1:500         |
| BECN1 (Mouse)           | Santa cruz biotechnology  | Sc-48341    | 1:1,000       |
| P62 (Rabbit)            | Gene Tex                  | GTX102359   | 1:1,000       |
| LC3 (Rabbit)            | Cell signaling technology | 4108        | 1:1,000       |

**Table S2.** List of primer for quantitative real time polymerase chain reaction. (qRT-PCR).

| Gene          |         | Primers                             |
|---------------|---------|-------------------------------------|
| <i>Actb</i>   | Forward | 5'-CCG TAA AGA CCT CTA TGC CAA C-3' |
|               | Reverse | 5'-GCA GTA ATC TCC TTC TGC ATC C-3' |
| <i>Notch1</i> | Forward | 5'-TAA TTG CCA GAC CAA CAT CAA C-3' |
|               | Reverse | 5'-CAC TTG TAT CCA GCG ACA TCA T-3' |

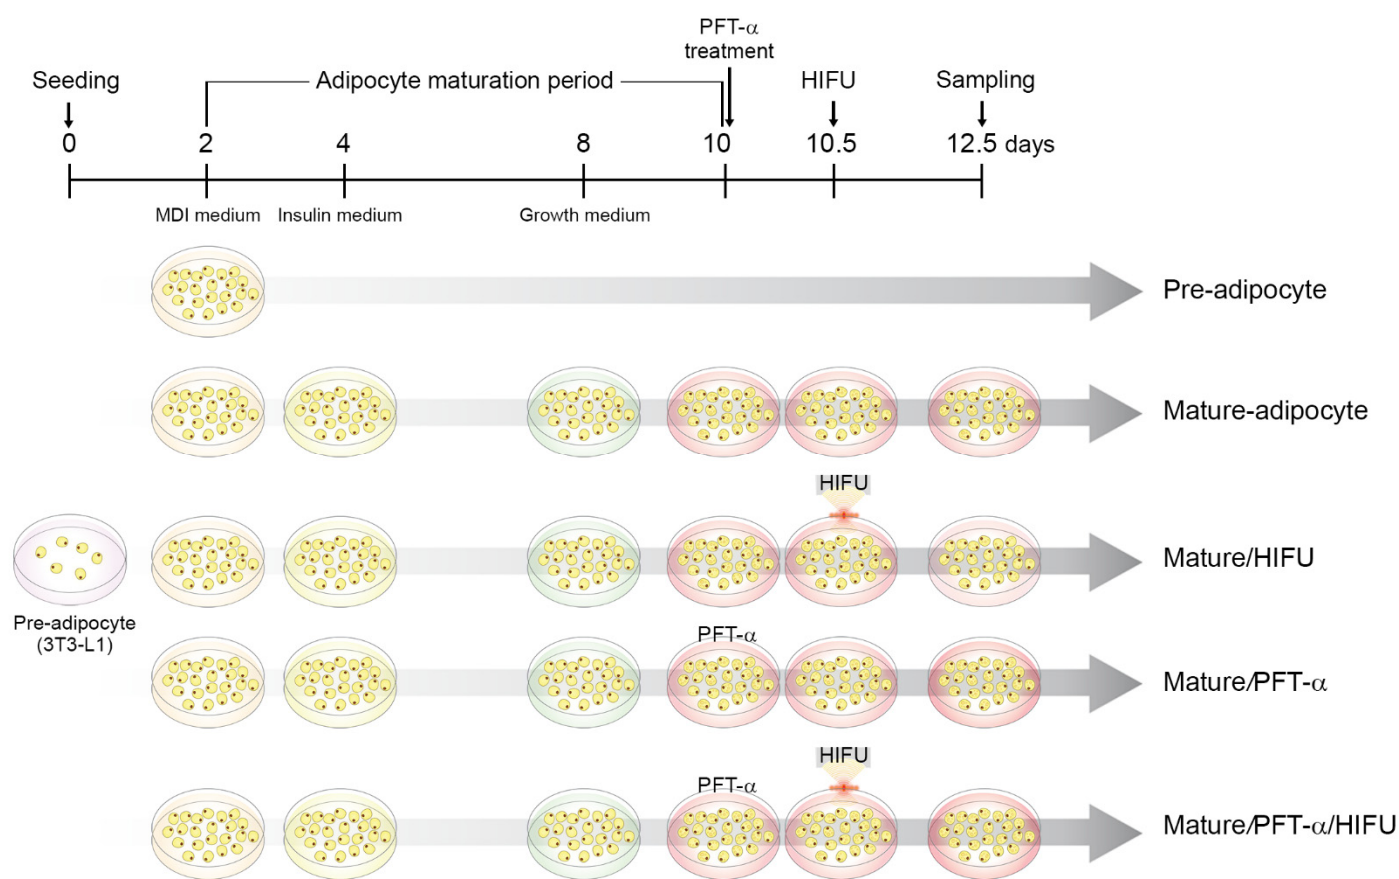

**Figure S1.** In vitro model schematic summary.

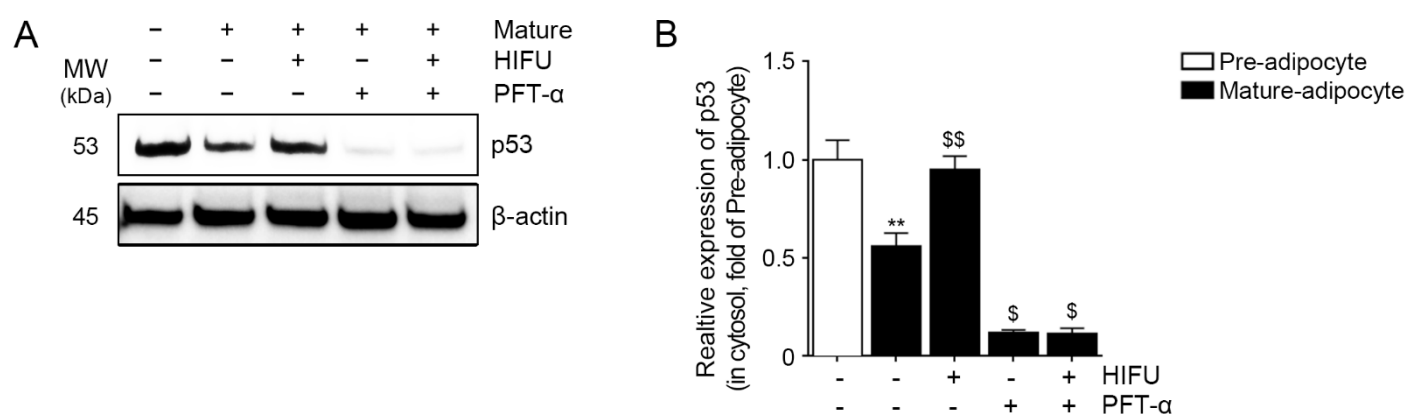

**Figure S2.** Regulation of the p53 in adipocytes by HIFU treatment. (A) The protein expression levels of p53 were analyzed by western blot. (B) The quantitative graphs represent the results of the western blot analysis. The protein expression level of p53 was increased by HIFU treatment and decreased modulating p53. The data are presented as the mean  $\pm$  standard deviation; \*\*,  $p < 0.01$  Mature-adipocyte vs. Pre-adipocyte; \$,  $p < 0.05$  or \$\$,  $p < 0.01$  vs. Mature-adipocyte (Mann–Whitney U test). HIFU, high-intensity focused ultrasound; MW, molecular weight; PFT- $\alpha$ , pifithrin- $\alpha$  hydrobromide.

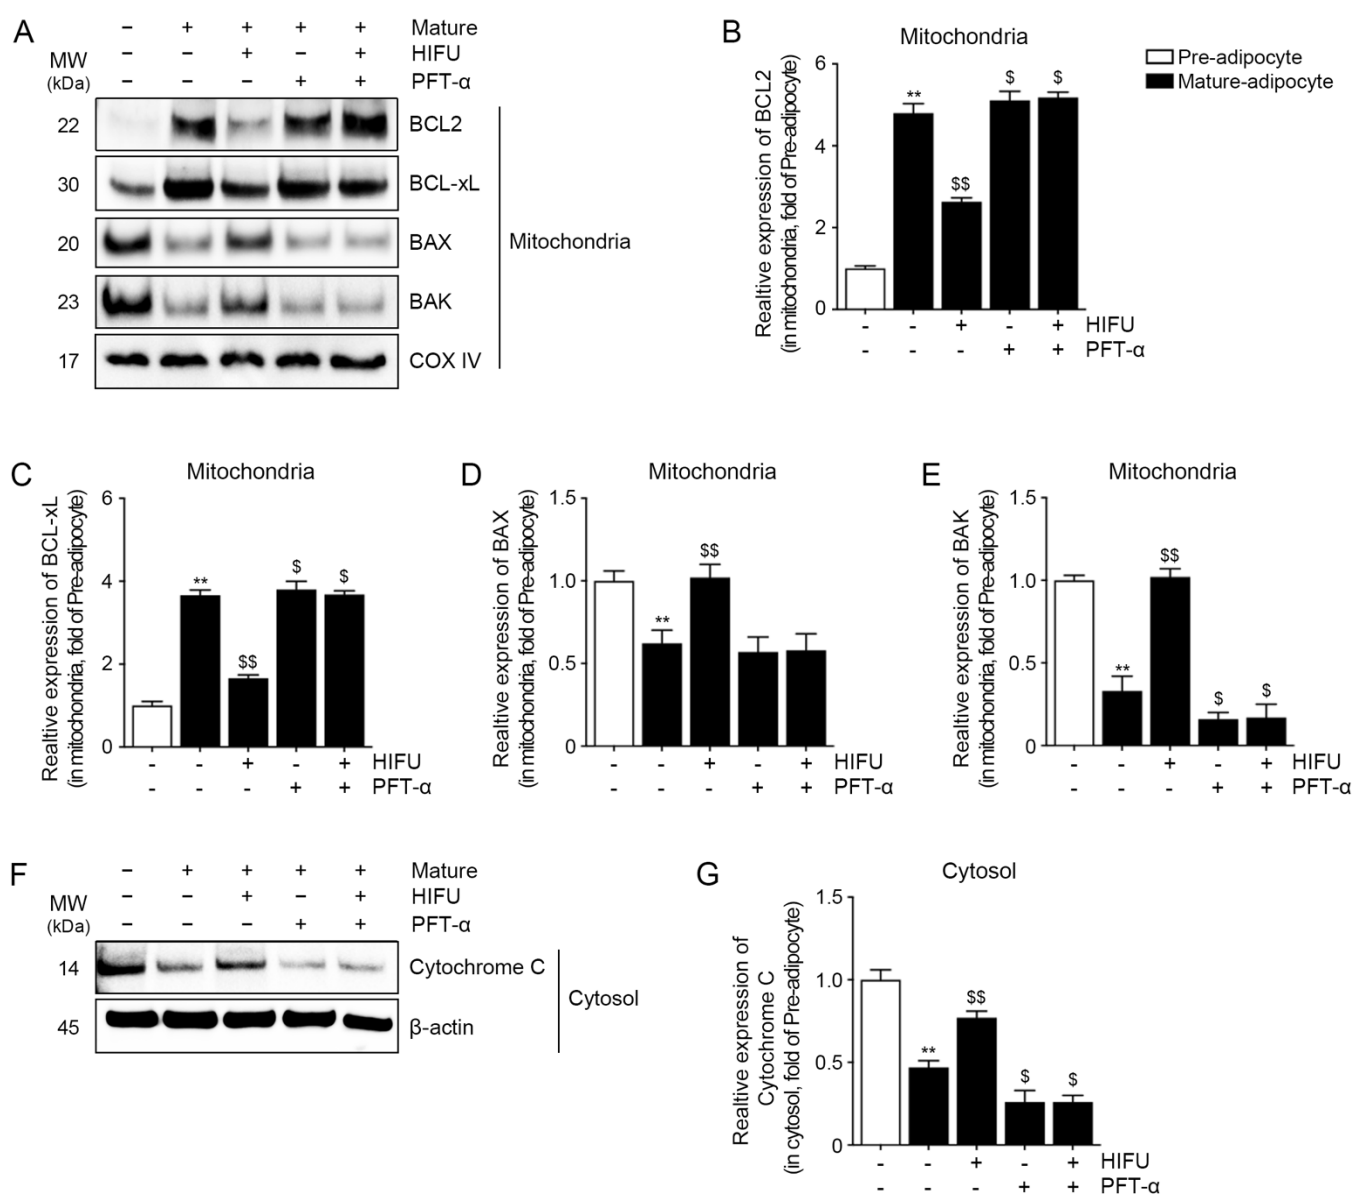

**Figure S3.** Regulation of the Bcl-2 family and cytochrome C in adipocytes by HIFU treatment. (A) The protein expression levels of Bcl-2 family members were analyzed by western blot. (B–E) The quantitative graphs represent the results of the western blot analysis. The protein expression levels of BCL2 (B) and BCL-xL (C) were decreased by HIFU treatment and increased modulating p53. The protein expression levels of BAX (D) and BAK (E) were increased by HIFU treatment and decreased modulating p53. (F) The protein expression of Cyto C was analyzed by western blot. (G) The quantitative graphs represent the results of the western blot analysis. The protein expression of Cyto C was increased by HIFU treatment and decreased modulating p53. The data are presented as the mean  $\pm$  standard deviation; \*\*,  $p < 0.01$  Mature-adipocyte vs. Pre-adipocyte; \$,  $p < 0.05$  or \$\$,  $p < 0.01$  vs. Mature-adipocyte (Mann–Whitney U test). BAK, Bcl-2 homologous antagonist/killer; BAX, bcl-2-like protein 4; BCL2, B-cell lymphoma 2; BCL-xL, B-cell lymphoma-extra large; COX IV, cytochrome c oxidase subunit 4; Cyto C, cytochrome C; HIFU, high-intensity focused ultrasound; MW, molecular weight; PFT- $\alpha$ , pifithrin- $\alpha$  hydrobromide.

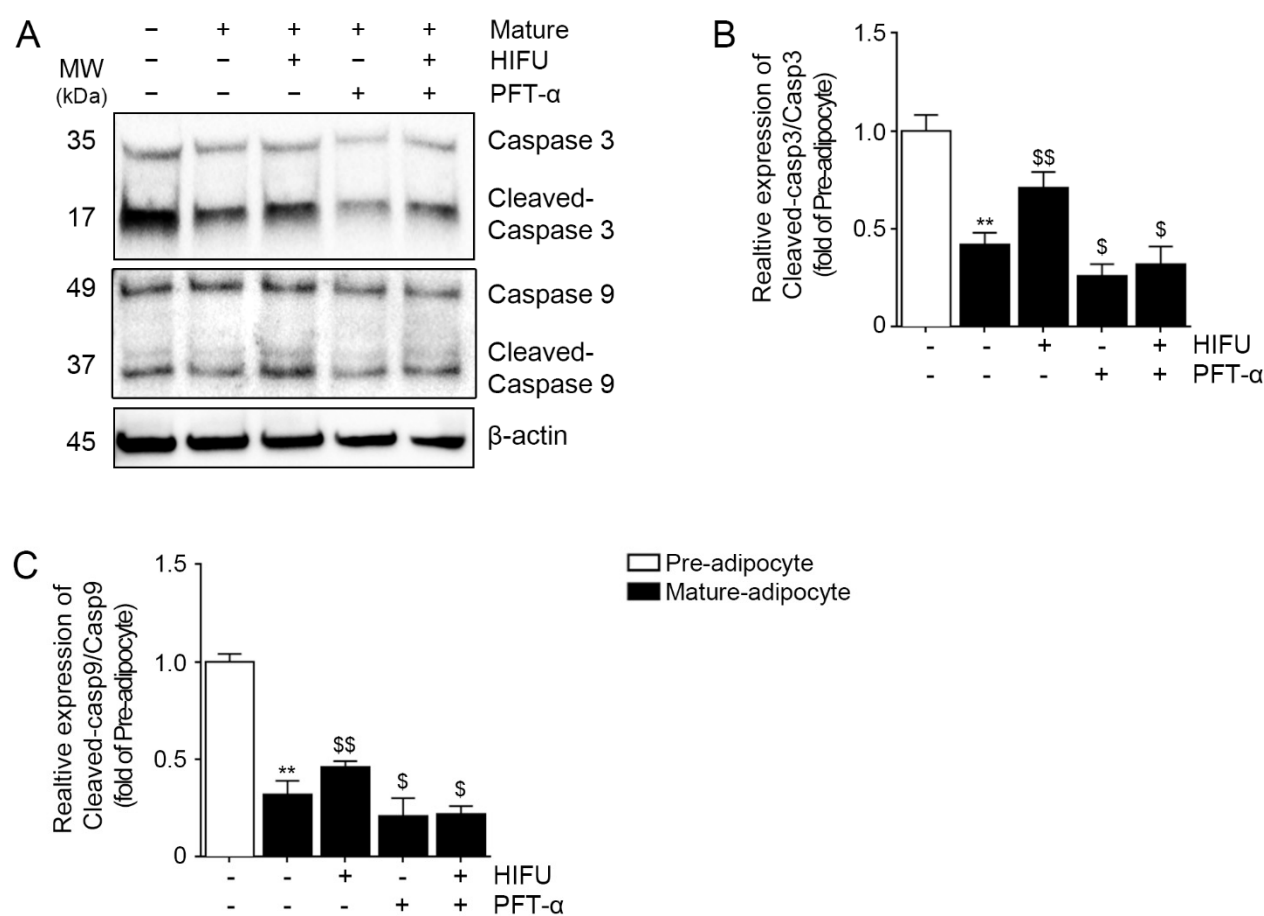

**Figure S4.** Regulation of apoptosis in adipocytes by HIFU treatment. (A) The protein expression levels of caspase 3 and caspase 9 were analyzed by western blot. (B and C) The quantitative graphs represent the results of the western blot analysis. The protein expression ratios of cleaved caspase 3/caspase 3 (B) and cleaved caspase 9/caspase 9 (C) were increased by HIFU treatment and decreased modulating p53. The data are presented as the mean  $\pm$  standard deviation; \*\*,  $p < 0.01$  Mature-adipocyte *vs.* Pre-adipocyte; \$,  $p < 0.05$  or \$\$,  $p < 0.01$  *vs.* Mature-adipocyte (Mann–Whitney U test). HIFU, high-intensity focused ultrasound; MW, molecular weight; PFT- $\alpha$ , pifithrin- $\alpha$  hydrobromide.

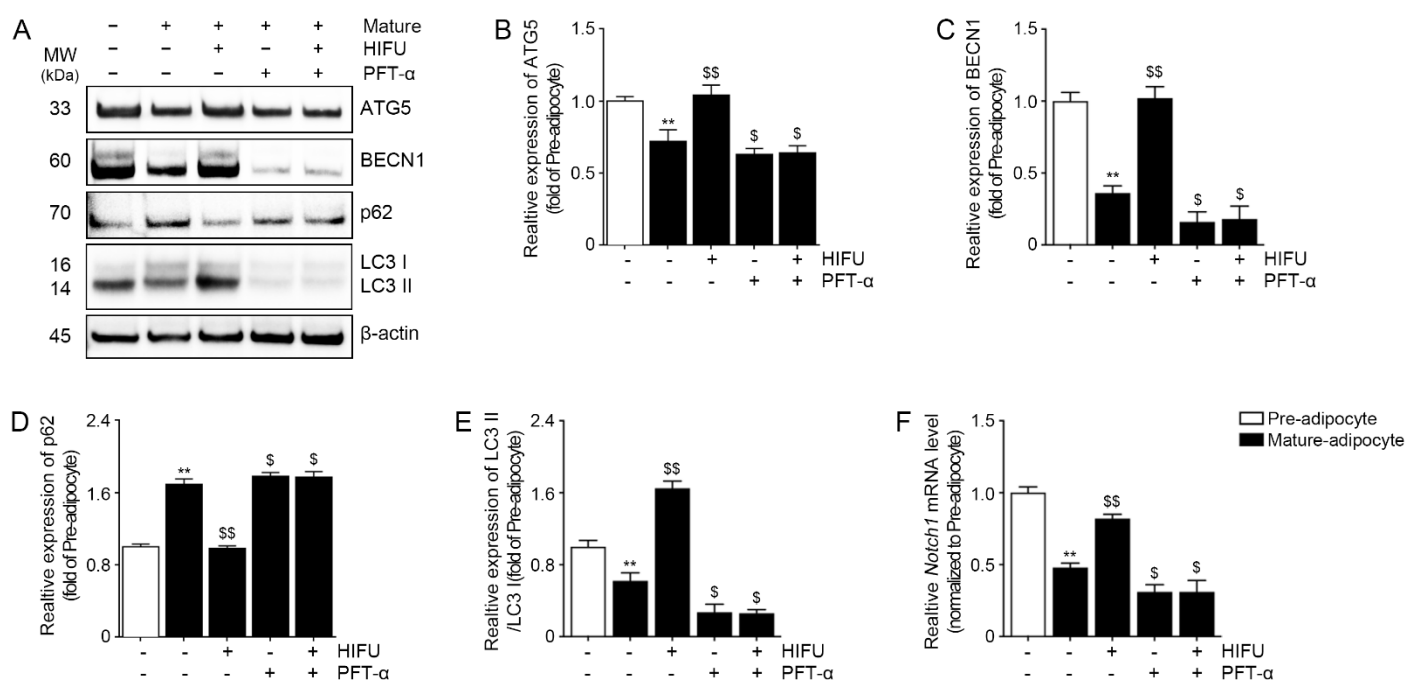

**Figure S5.** Regulation of autophagy in adipocytes by HIFU treatment. (A) The protein expression levels of autophagy-related markers were analyzed by western blot. (B–E) The quantitative graphs represent the results of the western blot analysis. The protein expression of ATG5 (B), BECN1 (C), and p62 (D) and the ratio of LC3II to LC3I (E) were regulated by HIFU treatment and p53. The data are presented as the mean  $\pm$  standard deviation; \*\*,  $p < 0.01$  Mature-adipocyte *vs.* Pre-adipocyte; \$,  $p < 0.05$  or \$\$,  $p < 0.01$  *vs.* Mature-adipocyte (Mann–Whitney U test). ATG5, autophagy related 5; BECN1, beclin-1; HFD, high-fat diet; HIFU, high-intensity focused ultrasound; LC3, microtubule-associated protein 1A/1B-light chain 3; MW, molecular weight; PFT- $\alpha$ , pifithrin- $\alpha$  hydrobromide.
